# Supplementary material for: The Influence of Age and Gender in Knowledge, Behaviors and Attitudes Towards Sun Protection: A Cross-Sectional Survey of Australian Outpatient Clinic Attendees
Source: Springer Nature journal article supplement (doi:10.1007/s40257-014-0106-4), 2014-12-16
Supplement: MOESM1 [file 40257_2014_106_MOESM1_ESM.pdf]

## **Electronic Supplementary Material 1**

**Article Title:** The influence of age and gender in knowledge, behaviors and attitudes towards sun protection: a cross sectional survey of Australian outpatient clinic attendees

**Journal:** American Journal of Clinical Dermatology

**Authors:** Andrew Lee<sup>1</sup>, Kieran B Garbutcheon-Singh<sup>1</sup>, Shreya Dixit<sup>1</sup>, Pam Brown<sup>1</sup>, Saxon D Smith<sup>1</sup>

**Affiliations:** <sup>1</sup>Department of Dermatology, Royal North Shore Hospital, St Leonards, New South Wales, Australia

**Corresponding author contact:** a.lee@sydney.edu.au

### **Attitudes Towards Sun-Protective Behaviours Survey**

**Age group:** 18-30  31-45  46-60  61-75  over 75 years

**Gender:** Male  Female

**Postcode:**

**Level of highest education qualification:**

School Certificate (or equivalent) (up to year 10)

Higher School Certificate (or equivalent) (completed year 12)

Diploma/Certificate

Bachelor Degree

Masters or PhD

**Current employment status:**

Full-time  Part-time  Casual  Unemployed  Retired

**If you are currently employed, where do you spend the majority of your working day?**

Indoors  Outdoors  Both

**Have you ever had a skin cancer?** Yes  No

**In terms of sun protection, please tick which of the following measures you use:**

Use of sunscreen  If yes, do you use SPF 15+  SPF 30+  SPF 50+  or any ?

Wearing a long-sleeve shirt

Wearing a hat

Avoidance of the sun during peak times

**If you use sunscreen, do you (please tick any that apply to you):**

Apply during summer  autumn  winter  spring

Apply every day  or only when doing outside activities

Apply when sunbathing

Reapply every 2 hours  4 hours  6 hours  8 hours  Never

Do you reapply after swimming  and after sweating ?

**How much sunscreen do you apply to your face and body per application?**

5mL (1 teaspoon)  10mL (2 teaspoons)  20mL (1 tablespoon)

40mL (2 tablespoons)  Unsure

**If you do not use sunscreen or do not reapply sunscreen, please select which of the following barriers prevent you from doing so:**

Greasiness

- Causes burning eye   
Causes acne   
Forget   
Time-consuming   
Makes you vitamin D deficient   
Concern about nanoparticles   
Other  Please comment why \_\_\_\_\_

**Do you look at the expiry date of sunscreens before using them?**

- All the time   
Most of the time   
Some of the time   
Rarely   
Never

**Where do you store the sunscreen you use most often?**

- Cupboard  Car  Other  Please describe: \_\_\_\_\_

**Are you aware that sunscreen can become less effective if stored at a temperature greater than 25°C? Yes  No**

**Do you buy a new sunscreen every summer? Yes  No**

**What is your understanding of SPF 30? (please select one answer only):**

- A sunscreen with an SPF of 30 means a person can stay in the sun 30 times longer without burning than he or she could if not wearing sunscreen   
A sunscreen with an SPF of 30 provides twice as much protection as a sunscreen with an SPF of 15   
I don't know   
Neither of these options

**Regarding UVA and UVB (please select one answer only):**

- Only UVA rays can cause skin cancers   
Only UVB rays can cause skin cancers   
Both UVA and UVB rays can cause skin cancers   
Neither UVA nor UVB rays can cause skin cancers

**Do you currently use a solarium? Yes  No**

**Have you ever used a solarium? Yes  No**

**Do you self-examine for skin cancers? Yes  No**

**How often do you sunbathe with the intention to tan? \_\_\_\_\_**

**Do you apply sunscreen before sunbathing? Yes  No**

**How many times have you been sunburnt (redness and smarting pain) in the past year?**

- Never  Once to 5 times  6 to 10 times  Over 10 times

**Do you believe that vitamin D protects from cancer? Yes  No**

**Would you be willing to (tick all appropriate answers):**

- Give up sunbathing? Yes  No   
Use covering clothes for sun-protection? Yes  No   
Use sunscreen? Yes  No   
Stay in the shade? Yes  No
